# Supplementary material for: Metabolomics of Cerebrospinal Fluid Amino and Fatty Acids in Early Stages of Multiple Sclerosis
Source: MDPI journal article supplement (doi:10.3390/ijms242216271), 2023-11-13
Supplement: s1 [file s1]

## Supplementary Materials

**Supp. Table S1:** Basic CSF cytological and biochemical results of the MS group

| ID | Cerebrospinal fluid |         |         |           |            |               |              |               | Time from clinical symptoms to CSF collection (months) |
|----|---------------------|---------|---------|-----------|------------|---------------|--------------|---------------|--------------------------------------------------------|
|    | IEF IgG             | IEF IgA | IEF IgM | IEF Kappa | IEF Lambda | Protein (g/l) | Glc (mmol/l) | Mononucl (µl) |                                                        |
| 1  | 5                   | 3       | 4       | 2         | 1          | 0.31          | 5.5          | 19            | 0.3                                                    |
| 2  | 7                   | 10      | 9       | 8         | 5          | 0.32          | 3.85         | 4             | 0.7                                                    |
| 3  | 7                   | 11      | 21      | 10        | 2          | 0.26          | 3.31         | 40            | 0.2                                                    |
| 4  | 9                   | 9       | 9       | 8         | 7          | 0.25          | 3.12         | 12            | 1                                                      |
| 5  | 1                   | 1       | 1       | 0         | 0          | 0.27          | 3.10         | 2             | 1.5                                                    |
| 6  | 13                  | 11      | 9       | 15        | 12         | 0.26          | 3.44         | 30            | 1                                                      |
| 7  | 17                  | 11      | 22      | 16        | 11         | 0.32          | 3.41         | 4             | N/A                                                    |
| 8  | 3                   | 10      | 8       | 10        | 8          | 0.15          | 3.35         | 8             | 3                                                      |
| 9  | 2                   | 2       | 0       | 6         | 1          | 0.43          | 3.31         | 27            | 1                                                      |
| 10 | 14                  | 12      | 5       | 12        | 0          | 0.25          | 3.36         | 2             | 60                                                     |
| 11 | 9                   | 8       | 8       | 7         | 8          | 0.41          | 3.04         | 13            | 0.5                                                    |
| 12 | 6                   | 8       | 8       | 8         | 0          | 0.43          | 3.11         | 34            | 6                                                      |
| 13 | 10                  | 7       | 5       | 9         | 10         | 0.45          | 2.94         | 42            | 1.5                                                    |
| 14 | 10                  | 9       | 4       | 4         | 8          | 0.19          | 3.85         | 2             | 0.1                                                    |
| 15 | 16                  | 14      | 13      | 16        | 6          | 0.40          | 3.72         | 22            | 0.7                                                    |
| 16 | 12                  | 4       | 7       | 2         | 0          | 0.20          | 3.27         | 30            | 0.7                                                    |
| 17 | 15                  | 0       | 8       | 6         | 0          | 0.33          | 2.75         | 5             | 1                                                      |
| 18 | 9                   | 14      | 14      | 11        | 10         | 0.37          | 3.21         | 2             | 3                                                      |
| 19 | 2                   | 1       | 3       | 3         | 6          | 0.21          | 3.47         | 3             | 24                                                     |
| 20 | 8                   | 9       | 6       | 3         | 12         | 0.46          | 3.31         | 20            | 4                                                      |
| 21 | 5                   | 9       | 6       | 5         | 4          | 0.18          | 3.03         | 1             | 24                                                     |
| 22 | 9                   | 14      | 10      | 2         | 2          | 0.23          | 3.92         | 22            | 0.7                                                    |
| 23 | 0                   | 0       | 0       | 3         | 1          | 0.15          | 3.69         | 1             | 0.5                                                    |
| 24 | 4                   | 3       | 2       | 2         | 3          | 0.21          | 3.36         | 3             | 0.3                                                    |
| 25 | 0                   | 0       | 0       | 0         | 2          | 0.25          | 3.32         | 2             | 48                                                     |
| 26 | 2                   | 0       | 0       | 4         | 4          | 0.46          | 5.62         | 8             | 4                                                      |
| 27 | 5                   | 2       | 8       | 12        | 4          | 0.11          | 2.96         | 4             | 2                                                      |
| 28 | 7                   | 4       | 3       | 3         | 1          | 0.15          | 3.62         | 10            | 2                                                      |
| 29 | 7                   | 9       | 7       | 5         | 3          | 0.4           | 3.58         | 13            | N/A                                                    |
| 30 | 5                   | 5       | 1       | 6         | 7          | 0.36          | 3.79         | 6             | 1                                                      |
| 31 | 2                   | 0       | 0       | 0         | 0          | 0.31          | 3.04         | 3             | 0.3                                                    |
| 32 | 0                   | 0       | 1       | 1         | 1          | 0.37          | 3.24         | 5             | 1                                                      |
| 33 | 6                   | 0       | 1       | 0         | 0          | 0.32          | 3.1          | 2             | 3                                                      |
| 34 | 18                  | 12      | 9       | 10        | 6          | 0.27          | 3.27         | 3             | 4                                                      |
| 35 | 7                   | 3       | 0       | 1         | 0          | 0.27          | 3.31         | 2             | 3.3                                                    |
| 36 | 10                  | 10      | 7       | 9         | 6          | 0.49          | 3.85         | 13            | 0.3                                                    |
| 37 | 3                   | 0       | 1       | 0         | 3          | 0.22          | 3.26         | 6             | 1.7                                                    |
| 38 | 15                  | 16      | 0       | 1         | 9          | 0.38          | 3.01         | 12            | 0.7                                                    |
| 39 | 19                  | 15      | 10      | 1         | 13         | 0.28          | 3.29         | 20            | 1.5                                                    |
| 40 | 13                  | 0       | 4       | 2         | 13         | 0.16          | 3.12         | 4             | 0.2                                                    |

Note: ID = identification number; IEF = isoelectric focusing; Glc = glucose; Mononucl = number of mononuclear cells; N/A = non-available

**Supp. Table S2:** Clinical information of MS patients after the first clinical symptoms

| ID | Age | Sex | Date of CSF collection | Medical history | Pharmacological history | EDSS |        |        |         |
|----|-----|-----|------------------------|-----------------|-------------------------|------|--------|--------|---------|
|    |     |     |                        |                 |                         | 0    | ½ year | 1 year | 2 years |

|    |    |   |            |                                                        |                                                                                                                 |     |     |     |     |
|----|----|---|------------|--------------------------------------------------------|-----------------------------------------------------------------------------------------------------------------|-----|-----|-----|-----|
| 1  | 38 | M | 27.02.2017 | -                                                      | -                                                                                                               | 1.5 | 1.5 | 1   | 1.5 |
| 2  | 26 | F | 28.03.2017 | -                                                      | -                                                                                                               | 1   | 1   | 1   | 1   |
| 3  | 36 | F | 26.06.2018 | Atopic eczema                                          | -                                                                                                               | 2.5 | 3   | 2.5 | 2   |
| 4  | 27 | F | 04.10.2018 | -                                                      | -                                                                                                               | 2.5 | 1.5 | 1   | 2   |
| 5  | 43 | F | 17.10.2018 | Appendectomy<br>Cholecystectomy                        | Hormonal<br>anticonception                                                                                      | 2   | 1.5 | 1.5 | 1.5 |
| 6  | 32 | F | 09.01.2019 | Hypothyreosis                                          | Levothyroxinum 50 µg<br>daily                                                                                   | 2.5 | 2   | 2   | 2   |
| 7  | 28 | M | 23.01.2019 | -                                                      | -                                                                                                               | 1   | N/A | N/A | N/A |
| 8  | 27 | F | 13.03.2019 | WPW syndrome                                           | -                                                                                                               | 1   | 1.5 | 1.5 | 2   |
| 9  | 33 | F | 02.07.2019 | NS sight<br>impairment                                 | -                                                                                                               | 1.5 | N/A | N/A | N/A |
| 10 | 40 | F | 13.11.2019 | Hyperthyreosis                                         | Levothyroxinum 50 µg<br>daily                                                                                   | 1.5 | 1.5 | 1.5 | 1.5 |
| 11 | 31 | F | 04.12.2019 | -                                                      | Hormonal<br>Anticonception                                                                                      | 1.5 | 1.5 | 1.5 | 1.5 |
| 12 | 54 | F | 04.12.2019 | Arterial<br>hypertension,<br>obesity,<br>hypothyreosis | Levothyroxinum 137<br>mg, omeprazolum 20<br>mg,<br>hydrochlorothiazidum<br>25 mg, allopurinolum<br>300 mg daily | 2   | 2.5 | 2.5 | 2.5 |
| 13 | 18 | F | 30.12.2019 | Asthma<br>bronchiale,<br>depression*                   | Hormonal<br>Anticonception                                                                                      | 2.5 | 2   | 2   | 2.5 |
| 14 | 25 | F | 27.02.2020 | -                                                      | Hormonal<br>anticonception                                                                                      | 1.5 | 2   | 1.5 | 2   |
| 15 | 43 | M | 10.02.2020 | -                                                      | -                                                                                                               | 1   | N/A | N/A | N/A |
| 16 | 25 | F | 29.04.2020 | -                                                      | -                                                                                                               | 2.0 | 2   | 2   | 2   |
| 17 | 33 | F | 06.05.2020 | -                                                      | -                                                                                                               | 1.5 | N/A | N/A | N/A |
| 18 | 40 | F | 24.08.2020 | -                                                      | -                                                                                                               | 2   | N/A | N/A | N/A |
| 19 | 49 | F | 09.02.2021 | Appendectomy                                           | -                                                                                                               | 2.5 | 2.5 | 2.5 | 3   |
| 20 | 33 | F | 30.03.2021 | -                                                      | -                                                                                                               | 1   | 1.5 | 1.5 | 1.5 |
| 21 | 43 | F | 06.04.2021 | Gastroesophageal<br>reflux                             | Hormonal<br>anticonception,<br>omeprazolum 20 mg<br>daily                                                       | 3.5 | 5.5 | 5.5 | N/A |
| 22 | 27 | M | 06.04.2021 | -                                                      | -                                                                                                               | 1.5 | 2.0 | 2.0 | 2   |
| 23 | 28 | F | 13.04.2021 | -                                                      | -                                                                                                               | 3.5 | 2.5 | 2   | 2   |
| 24 | 36 | F | 04.05.2021 | -                                                      | -                                                                                                               | 2   | 2   | 2   | 2   |
| 25 | 27 | M | 05.05.2021 | -                                                      | -                                                                                                               | 2.5 | 2.5 | 2.5 | 2.5 |
| 26 | 50 | M | 14.07.2021 | -                                                      | -                                                                                                               | 1.5 | 1.5 | 1.5 | 1.5 |
| 27 | 26 | F | 05.10.2021 | Hypothyreosis                                          | Levothyroxinum 50 µg<br>daily                                                                                   | 1   | 1   | 1   | 1   |
| 28 | 29 | F | 11.10.2021 | -                                                      | -                                                                                                               | 2   | 2   | 2   | N/A |
| 29 | 21 | F | 09.11.2021 | -                                                      | -                                                                                                               | 0.5 | 0.5 | 0.5 | N/A |
| 30 | 41 | F | 01.12.2021 | Gastroesophageal<br>reflux                             | Omeprazolum 20 mg<br>daily                                                                                      | 1   | N/A | N/A | N/A |
| 31 | 39 | F | 12.06.2022 | Leidens mutation,<br>heterozygot                       | -                                                                                                               | 2   | 2   | 2   | N/A |
| 32 | 30 | M | 18.06.2022 | -                                                      | -                                                                                                               | 1   | N/A | N/A | N/A |
| 33 | 42 | F | 16.08.2022 | -                                                      | -                                                                                                               | 2   | 2   | 2   | N/A |
| 34 | 39 | F | 10.10.2022 | -                                                      | Hormonal<br>anticonception                                                                                      | 1.5 | 1.5 | 1.5 | N/A |
| 35 | 49 | M | 25.10.2023 | Radiotherapy of<br>seminoma                            | -                                                                                                               | 3.5 | 3.5 | 3.5 | N/A |
| 36 | 39 | M | 03.11.2022 | Arterial<br>hypertension                               | Telmisartanum 40 mg,<br>amlodipini besilas 10<br>mg, bisoprololi<br>fumaras 10 mg daily                         | 2   | 2   | N/A | N/A |
| 37 | 23 | F | 15.11.2022 | -                                                      | -                                                                                                               | 0.5 | 0.5 | N/A | N/A |
| 38 | 29 | F | 13.12.2021 | Hypothyreosis                                          | Levothyroxinum 132<br>µg daily                                                                                  | 3.5 | 4.0 | 4.0 | N/A |
| 39 | 19 | F | 21.12.2021 | Asthma bronchiale                                      | Salbutamoli sulfas 5<br>mg/ml when needed                                                                       | 1.5 | 1.5 | 2   | N/A |
| 40 | 24 | F | 12.01.2022 | Extirpation of<br>benign fibroma of                    | -                                                                                                               | 1   | 1   | 1.5 | N/A |

|  |  |  |  |                |  |  |  |  |  |
|--|--|--|--|----------------|--|--|--|--|--|
|  |  |  |  | the left mamma |  |  |  |  |  |
|--|--|--|--|----------------|--|--|--|--|--|

Note: ID = identification number; M = male; F = female; WPW = Wolf-Parkinson-White; NS = non-specific; N/A = non-available; \* depression in this patient was without specific medication

**Supp. Table S3:** Descriptive statistics of metabolomic results with their counted concentrations

| Metabolites | Arginine | Histidine | Choline | Serine  | Tyrosine | Spermidine | Glutamate | Oleic acid | Stearic acid | Linoleic acid |
|-------------|----------|-----------|---------|---------|----------|------------|-----------|------------|--------------|---------------|
| Mean MS     | 3.9709   | 7.0202    | 1.0436  | 2.2714  | 1.1033   | 0.0367     | 1.8884    | 8,797      | 2,774        | 3,130         |
| Mean C      | 5.2351   | 8.1649    | 1.2277  | 2.5921  | 1.2527   | 0.0314     | 2.1190    | 8,394      | 3,158        | 3,393         |
| Median MS   | 3.6882   | 7.0398    | 1.0231  | 2.3685  | 1.0380   | 0.0385     | 1.9001    | 8,742      | 2,971        | 3,094         |
| Median C    | 4.6538   | 8.1081    | 1.1885  | 2.6707  | 1.2490   | 0.0314     | 2.1024    | 8,403      | 3,137        | 3,331         |
| SD MS       | 1.4863   | 1.6554    | 0.2841  | 0.7321  | 0.2936   | 0.0111     | 0.3890    | 0,824      | 0,825        | 0,277         |
| SD C        | 1.9583   | 1.7159    | 0.3691  | 0.6051  | 0.2786   | 0.0059     | 0.3840    | 0,523      | 0,623        | 0,228         |
| Min. MS     | 0.5605   | 2.4933    | 0.3044  | 0.9225  | 0.5396   | 0.0046     | 0.9405    | 7,224      | 1,079        | 2,587         |
| Min. C      | 3.1720   | 4.2024    | 0.4670  | 1.0184  | 0.8008   | 0.0158     | 1.3817    | 7,440      | 1,559        | 2,888         |
| Max. MS     | 7.1839   | 10.3890   | 1.4823  | 4.0717  | 1.9188   | 0.0535     | 2.7748    | 10,944     | 4,209        | 4,116         |
| Max. C      | 10.5309  | 12.2885   | 1.9275  | 3.8221  | 1.7835   | 0.0447     | 3.4311    | 9,441      | 4,623        | 3,792         |
| T-value     | -3.0277  | -2.8498   | -2.3274 | -2.0199 | -2.1990  | 2.5818     | -2.5090   | 2,493      | -2,231       | -4,384        |
| P-value     | 0.0037   | 0.0058    | 0.0233  | 0.0473  | 0.0313   | 0.0124     | 0.0145    | 0,015      | 0,029        | 0,001         |

Note: MS = MS group patients; C = control group; SD = standard deviation; Min. = minimum; Max. = maximum

**Supp. Table S4:** Descriptive statistics of other metabolites without counted concentrations

| Metabolite     | Mean MS   | Mean C    | Median MS | Median C | SD MS     | SD C     | Min. MS | Min. C | Max. MS | Max. C | T-value | P-value |
|----------------|-----------|-----------|-----------|----------|-----------|----------|---------|--------|---------|--------|---------|---------|
| eMethionin     | 8504.86   | 6256.73   | 8300.5    | 6154.5   | 2293.06   | 896.85   | 5145.5  | 4811   | 13385   | 8452   | 5.573   | <0.001  |
| Homovanilic a. | 25611.18  | 29774.24  | 23860     | 28980    | 6850.19   | 8085.84  | 14365   | 16870  | 45280   | 48850  | -2.321  | 0.024   |
| Treonine       | 8363.92   | 9587.38   | 8235.3    | 9566.5   | 2797.24   | 2447.98  | 2823.5  | 3712   | 14440   | 15205  | -1.965  | 0.053   |
| Uridine        | 54333.68  | 73550.91  | 38018     | 57450    | 37916.23  | 46254.03 | 22045   | 25920  | 2E+05   | 2E+05  | -1.897  | 0.063   |
| Oxoglutaric a. | 3671.48   | 3466.02   | 3723.3    | 3501     | 585.98    | 400.76   | 2146.5  | 2368   | 4895    | 4597   | 1.743   | 0.086   |
| Serotonine     | 72399.12  | 36146.67  | 9551.3    | 8743     | 103619.34 | 70506.17 | 1712.5  | 2520   | 3E+05   | 3E+05  | 1.742   | 0.086   |
| Biotine        | 18633.25  | 23614.50  | 16049     | 21000    | 10638.00  | 14333.83 | 6746.5  | 8545   | 55730   | 64085  | -1.642  | 0.106   |
| Palmitoleic a. | 16785.92  | 15807.12  | 16475     | 15215    | 2676.63   | 2426.12  | 13145   | 11885  | 26565   | 23495  | 1.616   | 0.111   |
| Dopamine       | 7914.79   | 8832.67   | 7763      | 8593.5   | 2566.33   | 2475.26  | 2953.2  | 3886   | 14010   | 13225  | -1.532  | 0.130   |
| Adipic a.      | 93639.30  | 98516.06  | 94880     | 100850   | 19305.67  | 10593.10 | 34793   | 75585  | 1E+05   | 1E+05  | -1.342  | 0.185   |
| Creatine       | 414855.54 | 444733.33 | 408050    | 410100   | 100129.75 | 98329.90 | 137681  | 3E+05  | 6E+05   | 6E+05  | -1.266  | 0.210   |
| Tryptophane    | 75840.66  | 71938.48  | 73153     | 71055    | 12870.37  | 13716.55 | 44765   | 50455  | 1E+05   | 1E+05  | 1.230   | 0.223   |
| Leucine        | 46331.37  | 50641.21  | 43488     | 48665    | 16522.71  | 12977.94 | 18581   | 24640  | 1E+05   | 83070  | -1.229  | 0.223   |
| Adenine        | 208212.43 | 219853.18 | 209750    | 227400   | 44745.61  | 36331.27 | 69291   | 1E+05  | 3E+05   | 3E+05  | -1.209  | 0.231   |
| Alanine        | 9162.12   | 9821.76   | 9099.5    | 9458     | 2287.16   | 2585.61  | 3653.2  | 6084   | 12945   | 15245  | -1.131  | 0.262   |
| Uric a.        | 18416.67  | 16896.35  | 1890.66   | 1429.62  | 11654.81  | 8212.53  | 5335    | 4963   | 55645   | 43035  | 0.641   | 0.523   |
| Cystine        | 13257.83  | 13426.36  | 13175     | 13210    | 969.36    | 1277.90  | 11430   | 11495  | 15665   | 17615  | -0.619  | 0.539   |
| Aspartate      | 5438.97   | 5558.92   | 5458.5    | 5516     | 918.10    | 726.05   | 2998.1  | 3501   | 7198    | 6947   | -0.614  | 0.541   |
| Palmitic a.    | 53262.32  | 54647.30  | 60228     | 55413    | 20906.23  | 8844.53  | 10852   | 29667  | 78285   | 76128  | -0.372  | 0.712   |
| Myristic a.    | 4917.08   | 5009.62   | 4617.8    | 4904     | 2478.17   | 1479.14  | 2557.5  | 2872   | 17821   | 8931   | -0.194  | 0.847   |

Note: MS = MS patient group; C = control group; SD = standard deviation; Min. = minimum;  
Max. = maximum; a. = acid
